# Supplementary material
Source: Springer Nature journal article supplement (https://www.springermedizin.de/resource/supplementary/12889_2010_2891_MOESM2_ESM.pdf/9487584)

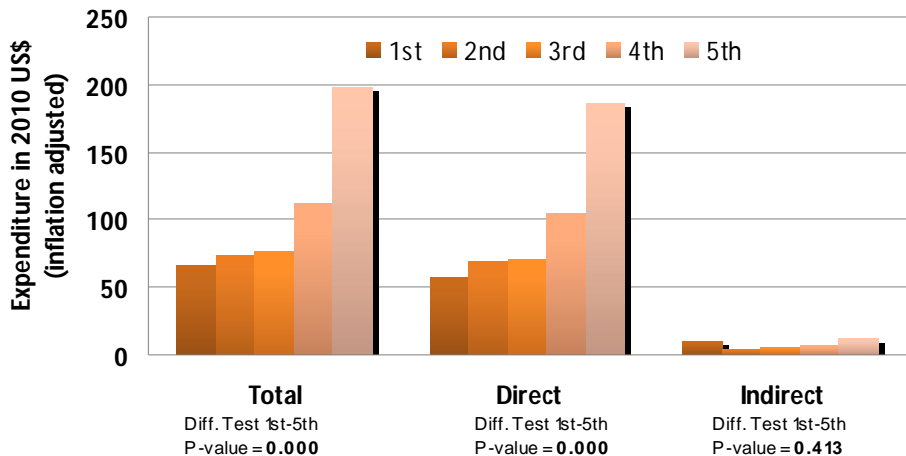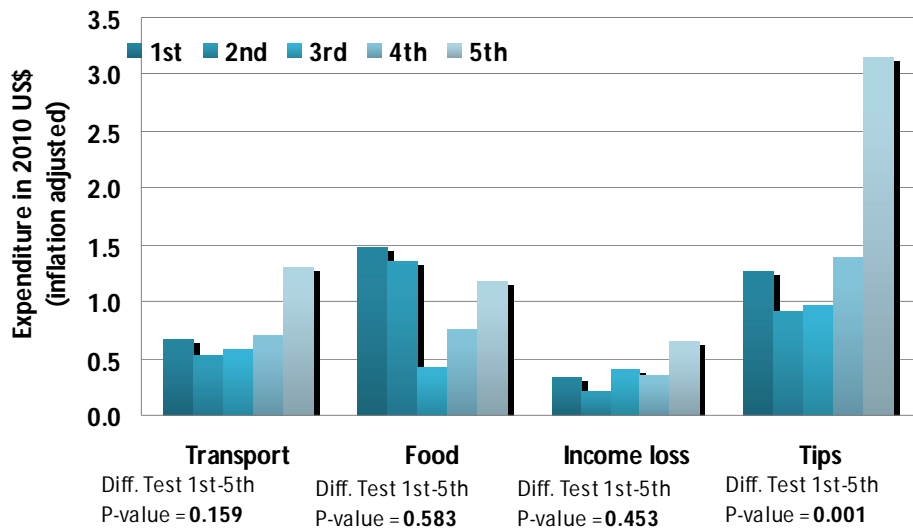

Supplement: MOESM2 [file 9487584]
